# Supplementary material for: Two independent sulfation processes regulate mouth-form plasticity in the nematodePristionchus pacificus
Source: Oxford University Press journal article supplement (doi:10.1242/dev.166272), 2018-07-01
Supplement: dev166272supp.pdf [file dev166272supp.pdf]

**Fig S1**  
**(A)**

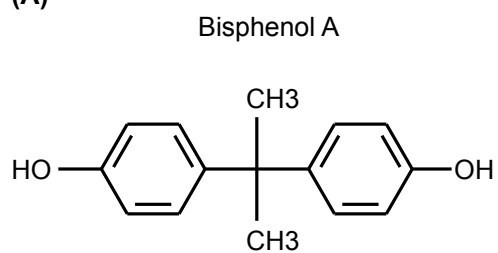

**(B)**

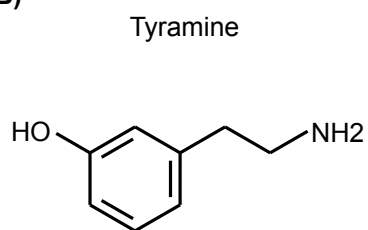

**(C)**

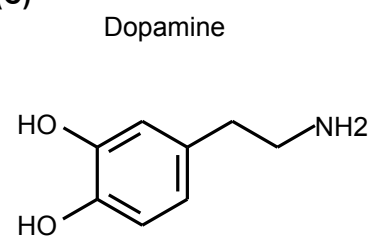

**Fig. S1:** Molecular structures of St form inducing chemicals; Bisphenol A, Tyramine and Dopamine.

Fig S2

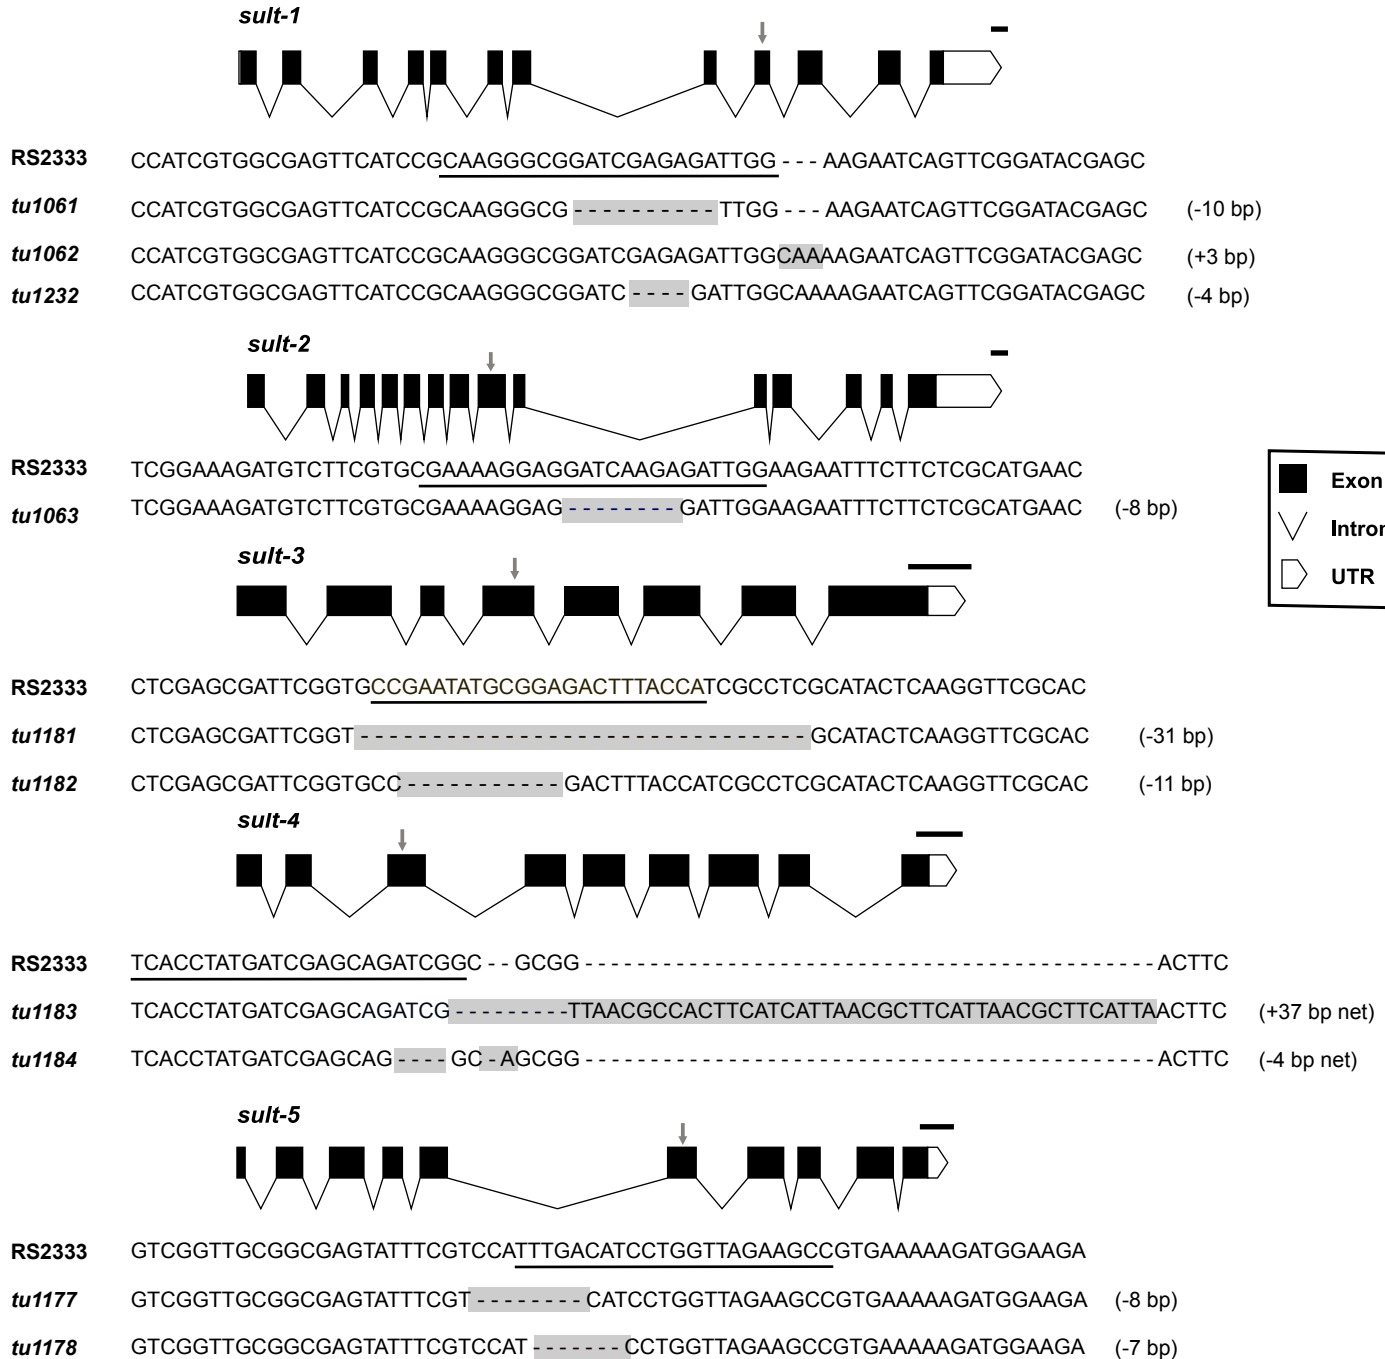

**Fig. S2: Mutant alleles of sult-1, sult-2, sult-3, sult-4 and sult-5 produced using CRISPR/Cas9 technique.** Arrows and underlined texts indicate sgRNA sequence including PAM of respective genes. Induced genetic lesions are highlighted in grey. Scale bar represents 100 bp.

**Fig S3**

|                       |                                                               |     |
|-----------------------|---------------------------------------------------------------|-----|
| WT                    | MVPRADDFVICTYPKCGTTWIQHIVHQLLKGTEYETAVDDDENDNVACQPSSSSHEKSEE  | 60  |
| <i>sult-1(tu1061)</i> | MVPRADDFVICTYPKCGTTWIQHIVHQLLKGTEYETAVDDDENDNVACQPSSSSHEKSEE  | 60  |
| <i>sult-1(tu1232)</i> | MVPRADDFVICTYPKCGTTWIQHIVHQLLKGTEYETAVDDDENDNVACQPSSSSHEKSEE  | 60  |
|                       | *****                                                         |     |
| WT                    | DEKKAMCFVSPMIERMGAAYSDTIKTPRVLKSHFTYKNIPKGGGAKYIFAVRNPDKCLTS  | 120 |
| <i>sult-1(tu1061)</i> | DEKKAMCFVSPMIERMGAAYSDTIKTPRVLKSHFTYKNIPKGGGAKYIFAVRNPDKCLTS  | 120 |
| <i>sult-1(tu1232)</i> | DEKKAMCFVSPMIERMGAAYSDTIKTPRVLKSHFTYKNIPKGGGAKYIFAVRNPDKCLTS  | 120 |
|                       | *****                                                         |     |
| WT                    | YFHNNRNFKIYDYEHEGFDFVFFKLFMDGKVGFGDYFDHLTSWLEGIEKAERILFLKYED  | 180 |
| <i>sult-1(tu1061)</i> | YFHNNRNFKIYDYEHEGFDFVFFKLFMDGKVGFGDYFDHLTSWLEGIEKAERILFLKYED  | 180 |
| <i>sult-1(tu1232)</i> | YFHNNRNFKIYDYEHEGFDFVFFKLFMDGKVGFGDYFDHLTSWLEGIEKAERILFLKYED  | 180 |
|                       | *****                                                         |     |
| WT                    | MVADLHSAVVQIASFLGGKAAEIIENDQKLAQIVEASTLASMKKNQQRWFPNKQLHRGEF  | 240 |
| <i>sult-1(tu1061)</i> | MVADLHSAVVQIASFLGGKAAEIIENDQKLAQIVEASTLASMKKNQQRWFPNKQLHRGEF  | 240 |
| <i>sult-1(tu1232)</i> | MVADLHSAVVQIASFLGGKAAEIIENDQKLAQIVEASTLASMKKNQQRWFPNKQLHRGEF  | 240 |
|                       | *****                                                         |     |
| WT                    | IRKGGSRDWKNQFGYEQS-FEMD--KKFRER-CAGTAAAEWWHSEMA-WNVS RPVVAVEP | 295 |
| <i>sult-1(tu1061)</i> | IRKG--VGRISSDTSNPSKWTRSSGNAARAQPLPSGGTARWPGTSVDPSSLSNPSAKCLP  | 298 |
| <i>sult-1(tu1232)</i> | IRKGGSIGRISSDTSNPSKWTRSSGNAARAQPLPSGGTARWPGTSVDPSSLSNPSAKCLP  | 300 |
|                       | **** . .. : * : . : * : . . : * * : : : . : * * . *           |     |
| WT                    | ISEVSSYSSSGFCSASPLSFTSSSLDLSSSLSSH-LRLPSVNPESDLCYSPAVEGPLDRD  | 354 |
| <i>sult-1(tu1061)</i> | IRRRRA-----SAPPRLSPSLHHHWISLPHSH---RISDSPQ-----               | 331 |
| <i>sult-1(tu1232)</i> | IRRRRA-----SAPPRLSPSLHHHWISLPHSH---RISDSPQ-----               | 333 |
|                       | * . : * : ** ** * : ** : : . **                               |     |
| WT                    | RVDSLQFPFDLKLKIDDATEEQD                                       | 376 |
| <i>sult-1(tu1061)</i> | -----                                                         | 331 |
| <i>sult-1(tu1232)</i> | -----                                                         | 333 |

**Fig. S3: Alignment of WT and mutant versions of SULT-1.**

Multiple sequence alignment SULT-1 amino acid sequences in WT and mutant alleles tu1061 and tu1232 using clustal Omega.

**Table S1: Sites for single guide RNA (sg-RNA) sequences**

|               |                         |
|---------------|-------------------------|
| <i>sult-1</i> | GCAAGGGCGGATCGAGAGATTGG |
| <i>sult-2</i> | GAAAAGGAGGATCAAGAGATTGG |
| <i>sult-3</i> | TGGTAAAGTCTCCGCATATTCCG |
| <i>sult-4</i> | TATGATCGAGCAGATCGGCGCGG |
| <i>sult-5</i> | ATTCGTCCATTTGACATCCTGG  |

**Table S2: Primer sequences for qPCR of sulfotransferase genes after CRISPR**

| Gene          | Forward primer          | Reverse primer            |
|---------------|-------------------------|---------------------------|
| <i>sult-1</i> | CAAAGATGGTTCCTAACCAAGCA | GATGAAGTGAAGGAGAGAGGCGA   |
| <i>sult-2</i> | GGTTGGACTTGGTGATTACTTCG | GCTAGTTCTCATCTTCCAAGAACCC |
| <i>sult-3</i> | AGCGGTGGTGAAGCAAATGG    | CCGGGAACTAAAGATTGTG       |
| <i>sult-4</i> | GACGGCGATTCTTGTTGC      | GGCCGTTTAGCCTGTATTGT      |
| <i>sult-5</i> | CAGAATCTTACGTACCTT      | GTAAGTAGTGAATTCTTGAA      |

**Table S3: Primer sequences for examining *sult-1* expression levels with qRT PCR**

| Gene                                  | Forward primer               | Reverse primer           |
|---------------------------------------|------------------------------|--------------------------|
| <i>Ppa-sult-1</i>                     | GTTTCATGGATGGAAAGGTCGGATTCCG | TGAGGCTTCGACTATCTGAGCCAG |
| <i>Ppa-cdc-42</i>                     | CTCTCTTATCCACAGACGGAC        | GAAGGGAGTGCGTGAGCAGTG    |
| <i>Ppa-<math>\beta</math>-tubulin</i> | CTCGGAGGAGGAACTGGATC         | GACCGTGTCAGAGACCTTAG     |
